# Supplementary material for: Triplet-driven chemical reactivity of β-carotene and its biological implications
Source: PubMed Central journal article supplement (PMC9072317; doi:10.1038/s41467-022-30095-z), 2022-05-05
Supplement: 41467_2022_30095_MOESM1_ESM.pdf [file 41467_2022_30095_MOESM1_ESM.pdf]

## Supplementary Information

### Triplet-driven chemical reactivity of $\beta$ -carotene and its biological implications

Mateusz Zbyradowski<sup>1</sup>, Mariusz Duda<sup>1</sup>, Anna Wisniewska-Becker<sup>1</sup>, Heriyanto<sup>1,2</sup>, Weronika Rajwa<sup>1</sup>, Joanna Fiedor<sup>3</sup>, Dragan Cvetkovic<sup>4</sup>, Mariusz Pilch<sup>1,5</sup>, and Leszek Fiedor\*<sup>1</sup>

<sup>1</sup>Faculty of Biochemistry, Biophysics and Biotechnology, Jagiellonian University, Gronostajowa 7, 30-387 Cracow, Poland

<sup>2</sup>Ma Chung Research Center for Photosynthetic Pigments, Ma Chung University Villa Puncak Tidar N-01, Malang 65151, Indonesia

<sup>3</sup>Faculty of Physics and Applied Computer Science, AGH-University of Science and Technology, 30-059 Cracow, Mickiewicza 30, Poland

<sup>4</sup>Faculty of Technology, University of Niš, 16000 Leskovac, Serbia

<sup>5</sup>Faculty of Chemistry, Jagiellonian University, Gronostajowa 2, 30-387 Kraków

\*Corresponding author, Email: leszek.fiedor@uj.edu.pl

#### Table of Contents

**Suppl. Figs 1 – 4** The breakdown of  $\beta$ -carotene endoperoxides in the dark monitored using mass spectrometry and electronic absorption spectroscopy.

**Suppl. Fig. 5** RP-HPLC analysis with in-line diode-array recording of electronic absorption spectra of the purified  $\beta$ -carotene (substrate) and its oxygenation products.

**Suppl. Fig. 6** The DFT-predicted vacuum-relaxed conformations of  $\beta$ -carotene, its two endoperoxides,  $\beta$ Car-5,8-EPO and  $\beta$ Car-7,10-EPO, and the corresponding isomeric carotenes formed after the release of the O<sub>2</sub> moiety.

**Suppl. Fig. 7** The electronic absorption spectrum of  $\beta$ -carotene recorded in acetone and the expanded (~100×) region between 600 and 750 nm showing the non-zero activity of the S<sub>2</sub> transition (inset).

**Suppl. Fig. 8** Changes in the emission lifetime of <sup>1</sup>O<sub>2</sub> in the presence of  $\beta$ Car or  $\beta$ Car-5,8-EPO in acetone.

**Suppl. Fig. 9** The DMPO-spin trapping of free radicals generated by  $\beta$ Car-5,8-EPO in liposomes.

**Suppl. Fig. 10** The positioning of  $\beta$ -carotenes in Photosystem II and xanthophylls in LHCII.

**Suppl. Table 1** The DFT-computed total energies of  $\beta$ -carotene ( $\beta$ Car), the O<sub>2</sub> molecule and other compounds involved in the formation and breakdown of  $\beta$ -carotene endoperoxides.

**Suppl. Table 2** The DFT-computed total energies and conformations of the endoperoxide moieties of  $\beta$ Car-5,8-EPO and  $\beta$ Car-7,10-EPO truncated at various sites.

**Suppl. Table 3** Comparison of the ab initio computed solvent effects on the basic electronic properties of  $\beta$ Car,  $\beta$ Car-5,8-EPO and  $\beta$ Car-7,10-EPO.

# Breakdown of $\beta$ -carotene-5,8-endoperoxide

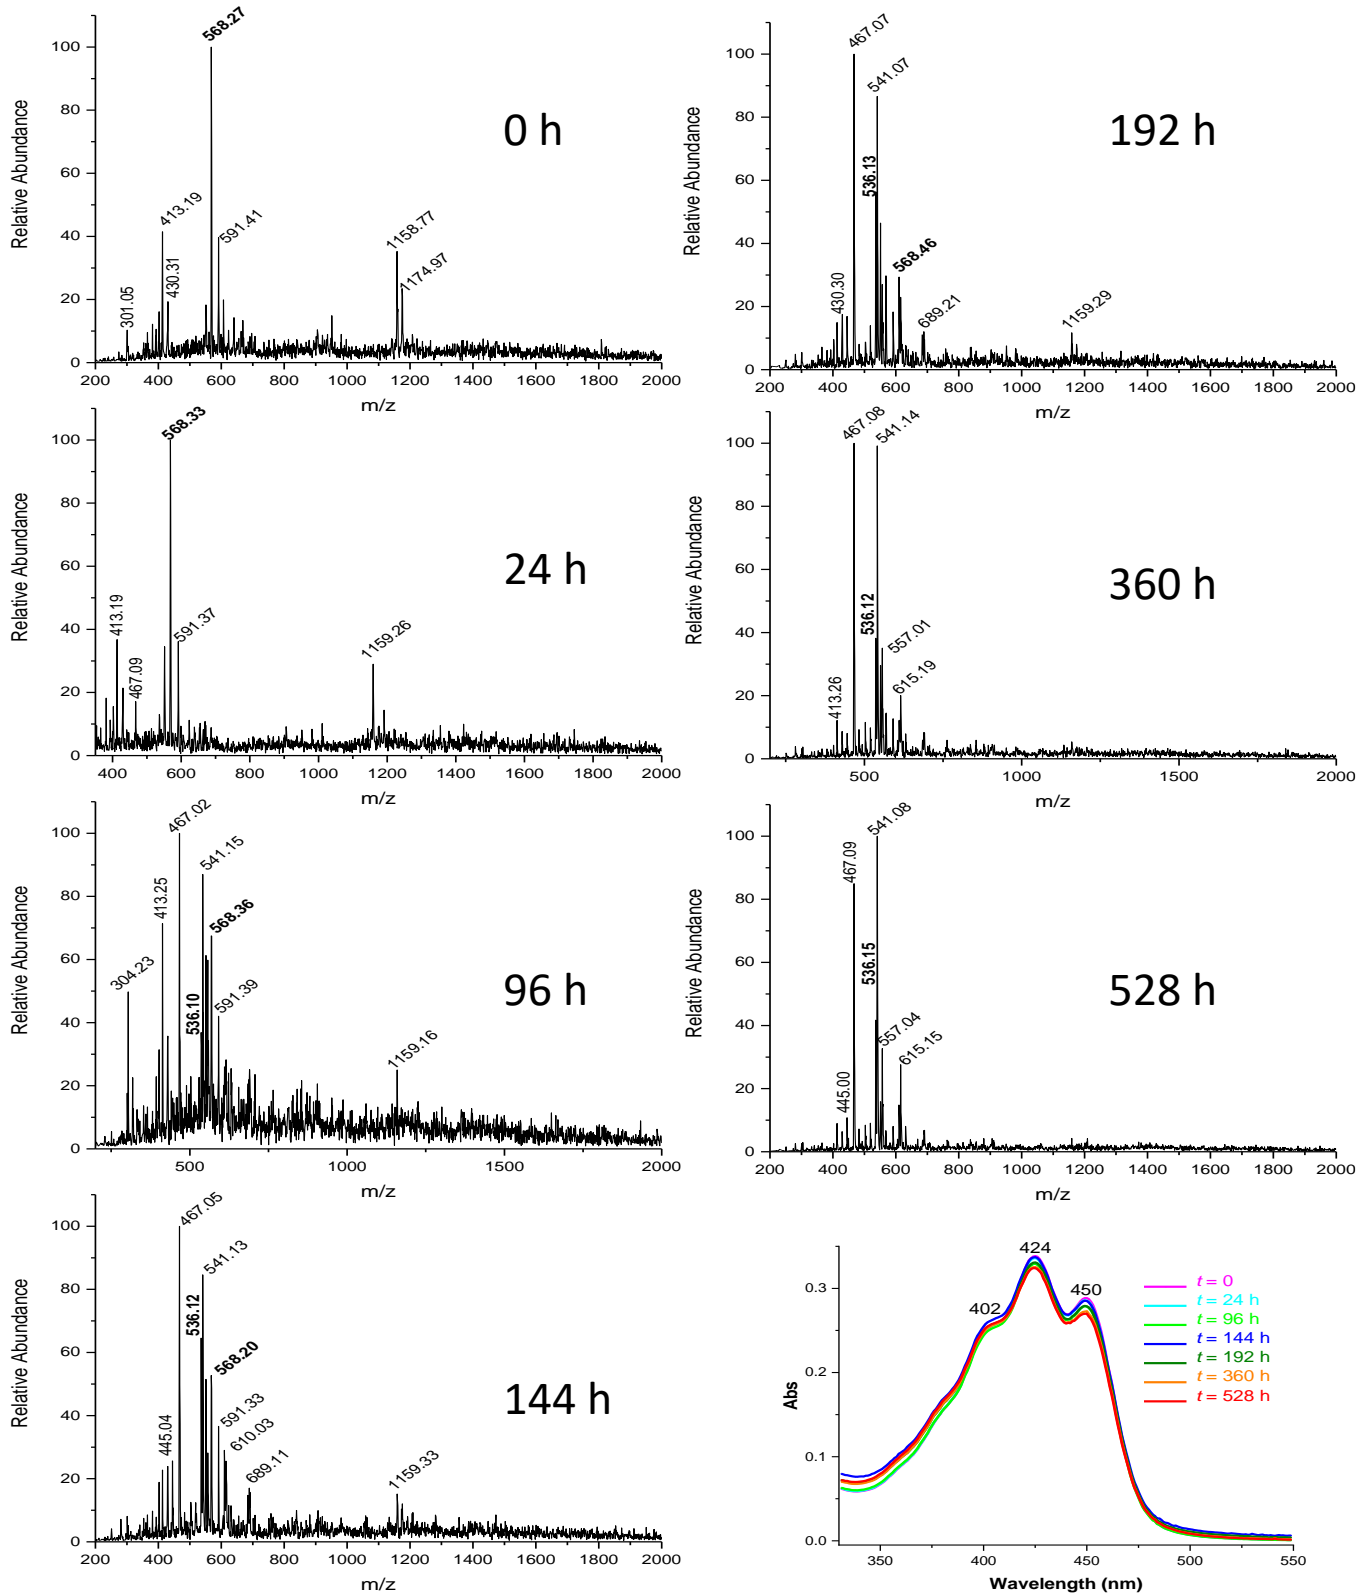

Supplementary Fig. 1 The breakdown of  $\beta$ -carotene-5,8-endoperoxide in methanol at ambient temperature in the dark monitored using mass spectrometry and electronic absorption spectroscopy. The experimental details are given under the Methods section.

# Breakdown of $\beta$ -carotene-7,10-endoperoxide

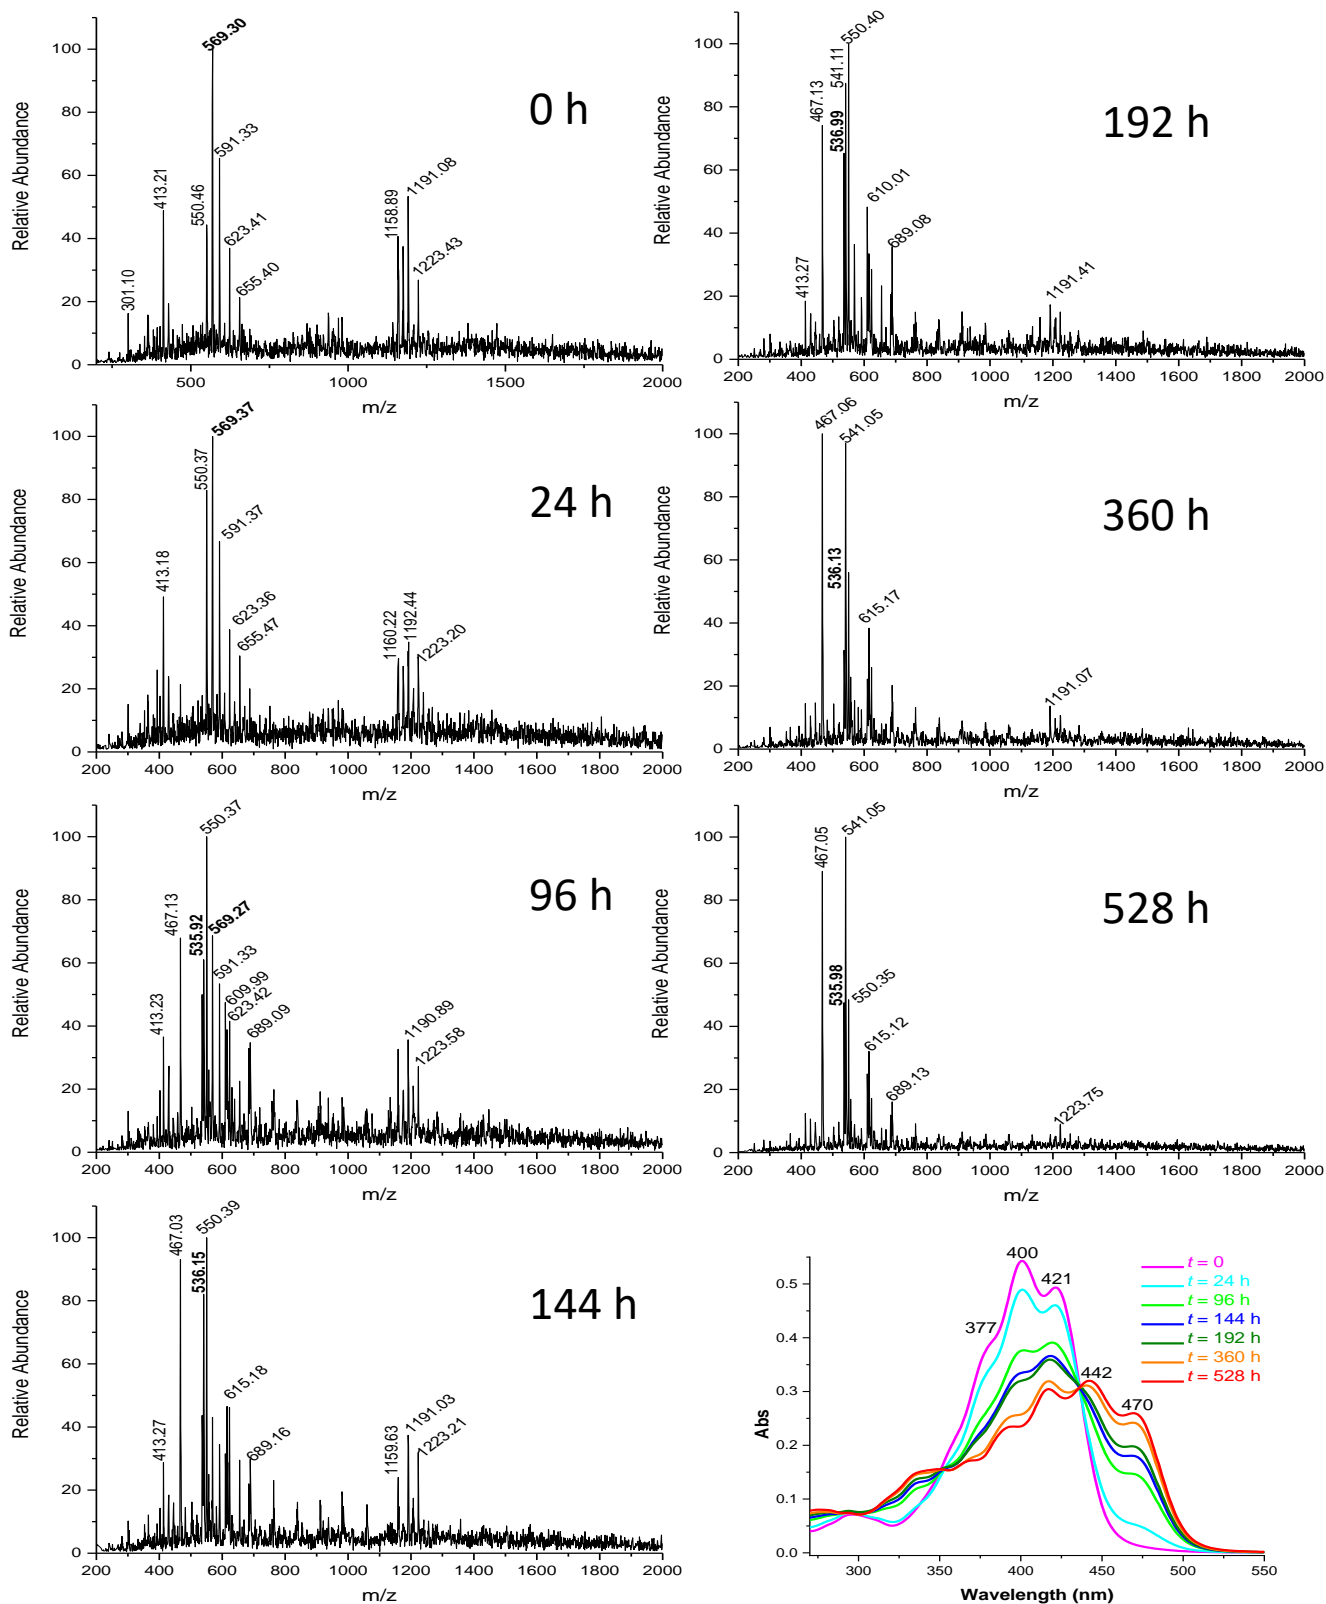

Supplementary Fig. 2 The breakdown of  $\beta$ -carotene-7,10-endoperoxide in methanol at ambient temperature in the dark monitored using mass spectrometry and electronic absorption spectroscopy. The experimental details are given under the Methods section.

# Breakdown of $\beta$ -carotene-5,8,7',10'-diendoperoxide

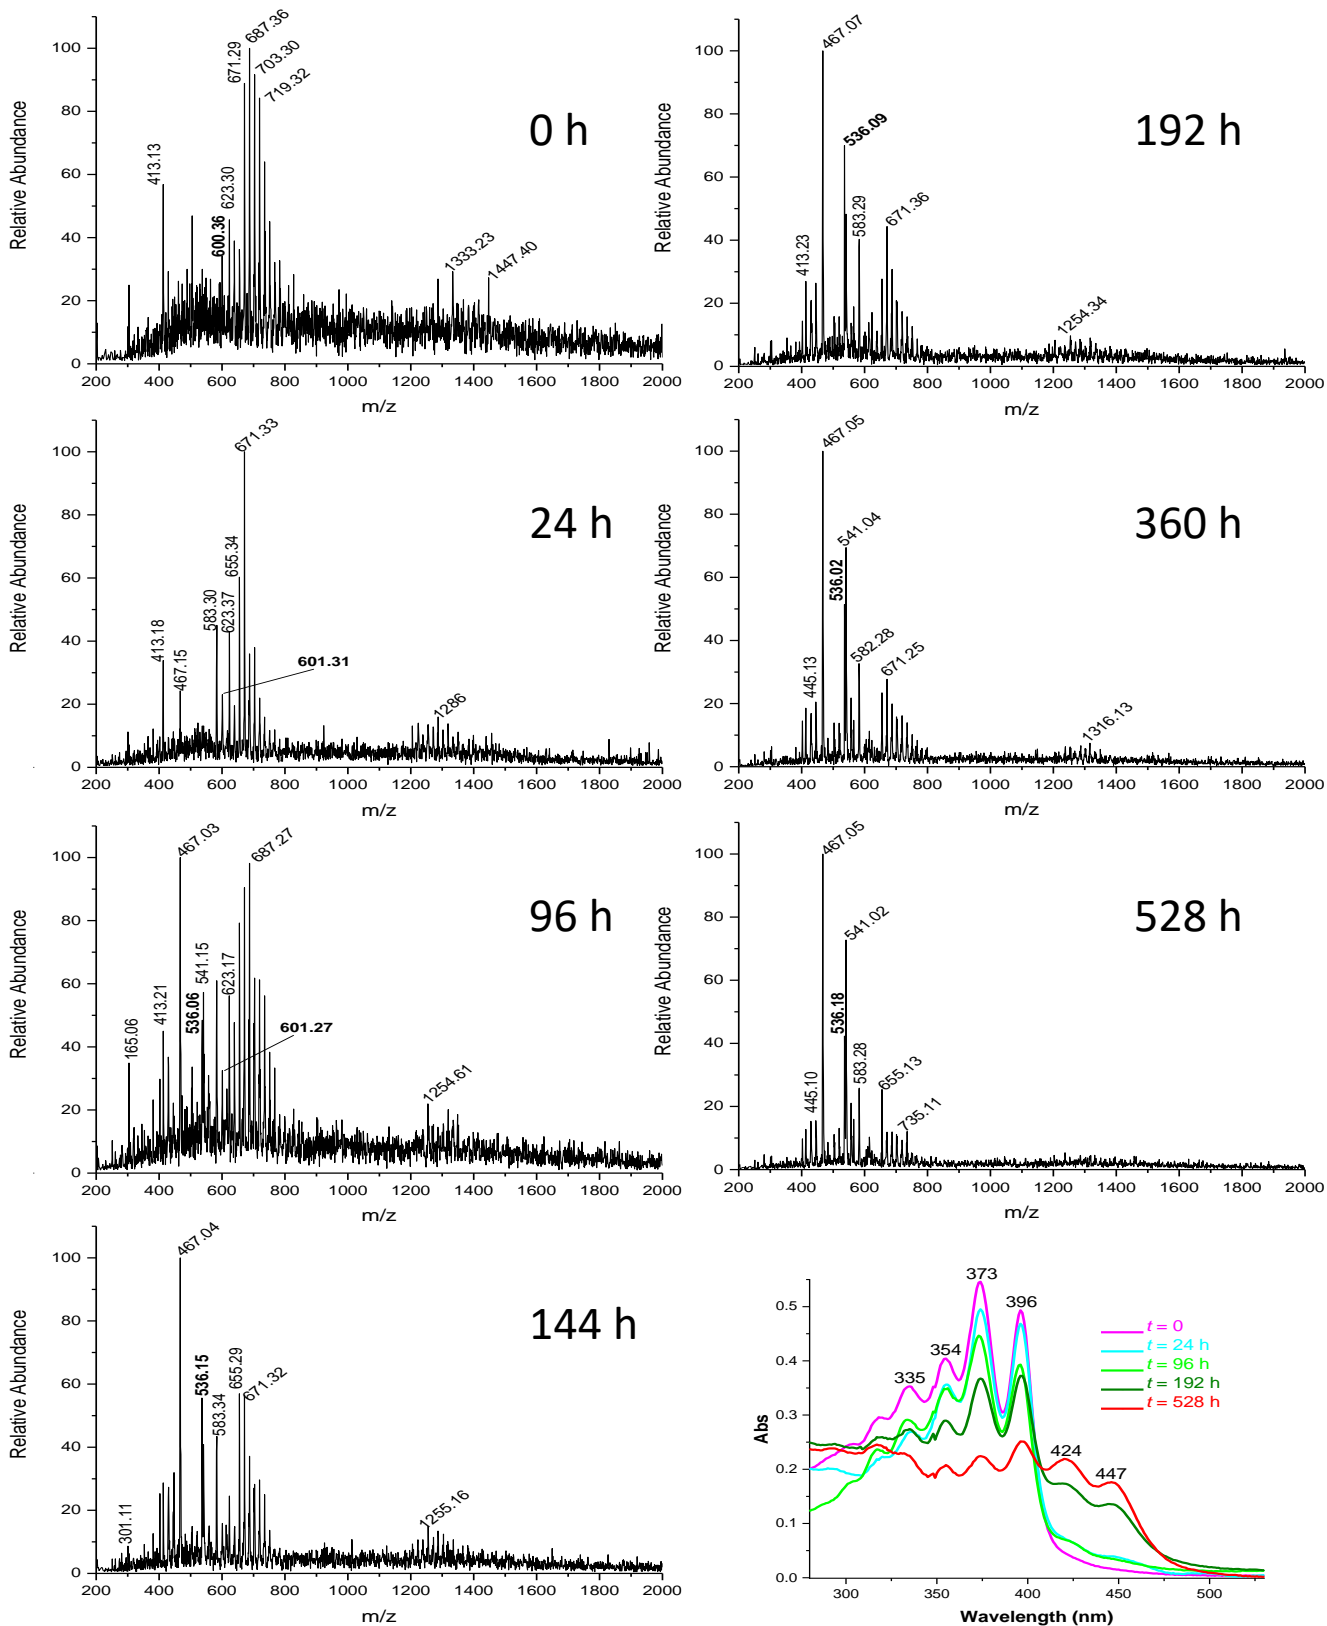

Supplementary Fig. 3 The breakdown of  $\beta$ -carotene-5,8,7',10'-diendoperoxide in methanol at ambient temperature in the dark monitored using mass spectrometry and electronic absorption spectroscopy. The experimental details are given under the Methods section.

# Breakdown of $\beta$ -carotene-5,8,5',8'-diendoperoxide

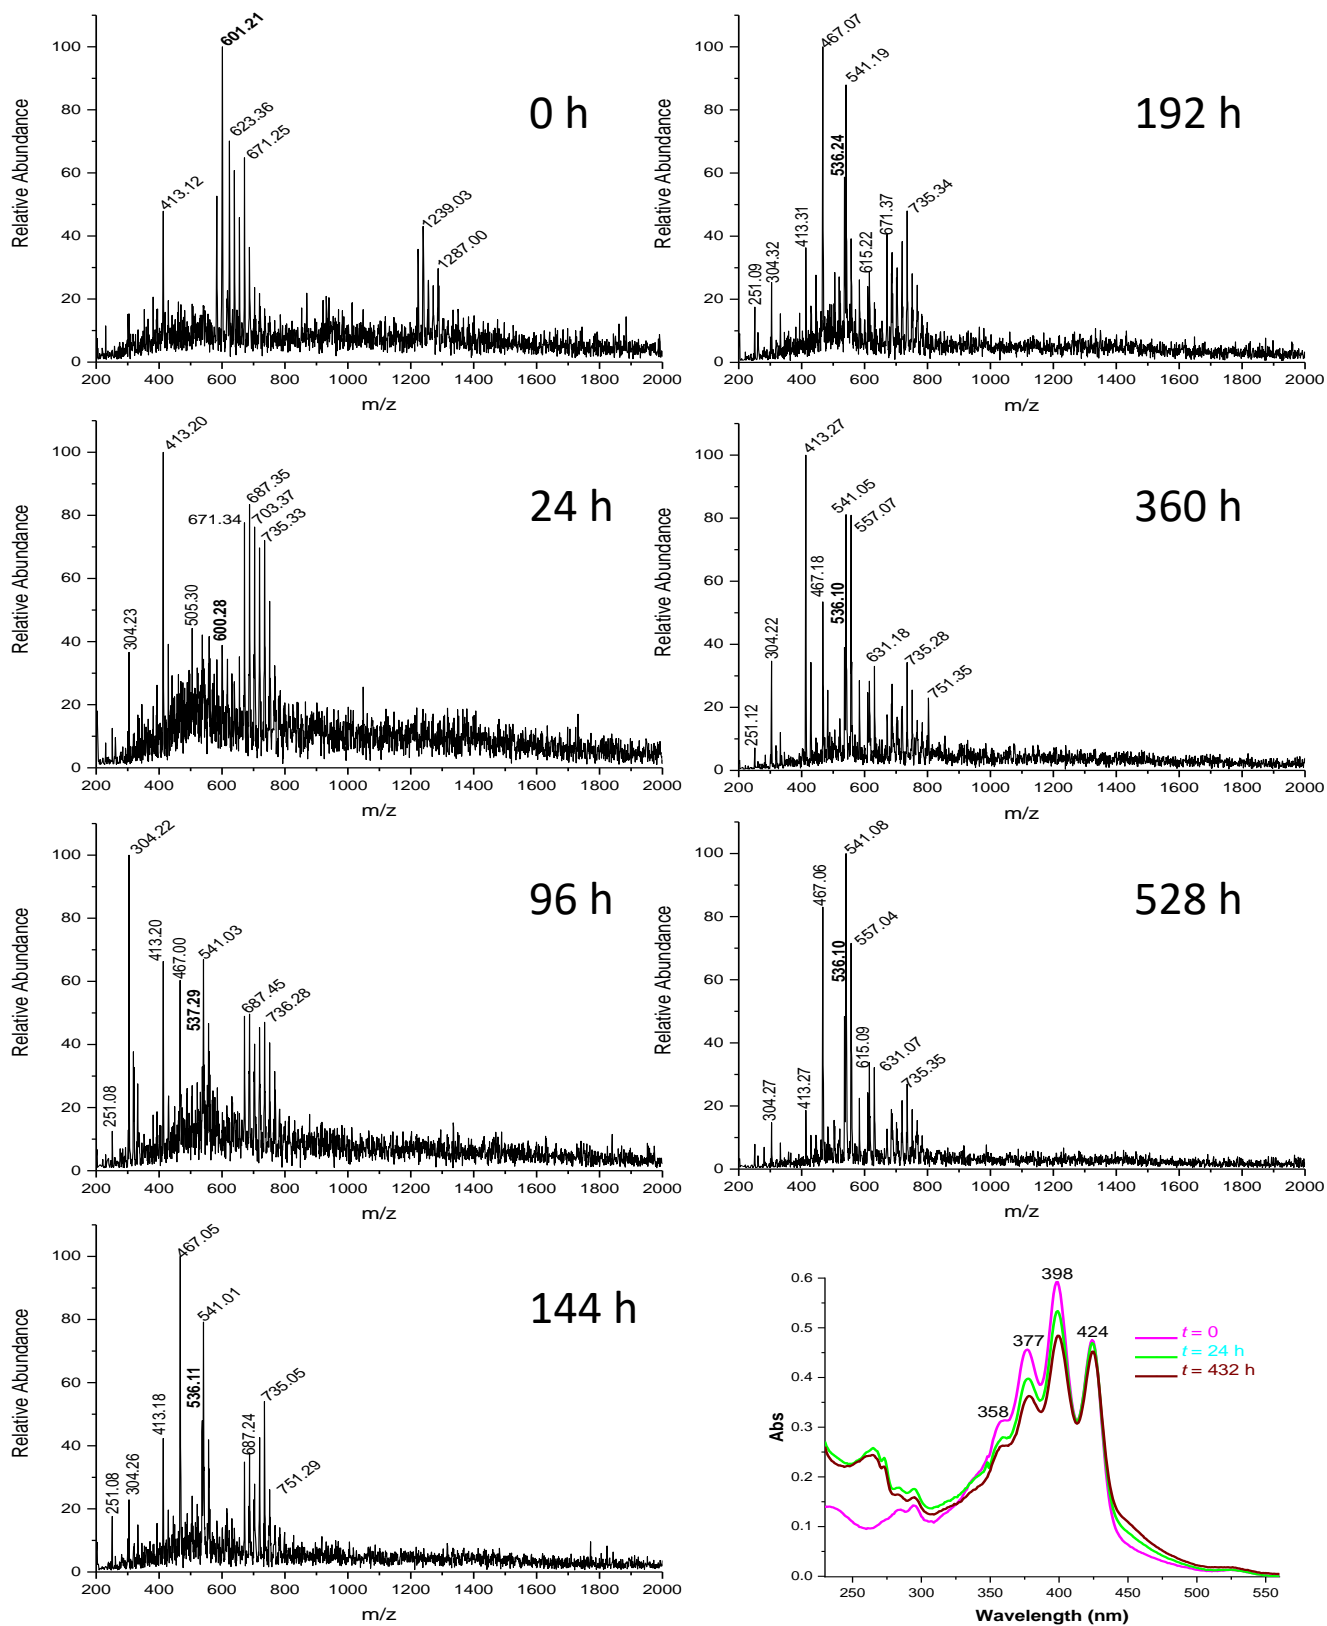

Supplementary Fig. 4 The breakdown of  $\beta$ -carotene-5,8,5',8'-diendoperoxide in methanol at ambient temperature in the dark monitored using mass spectrometry and electronic absorption spectroscopy. The experimental details are given under the Methods section.

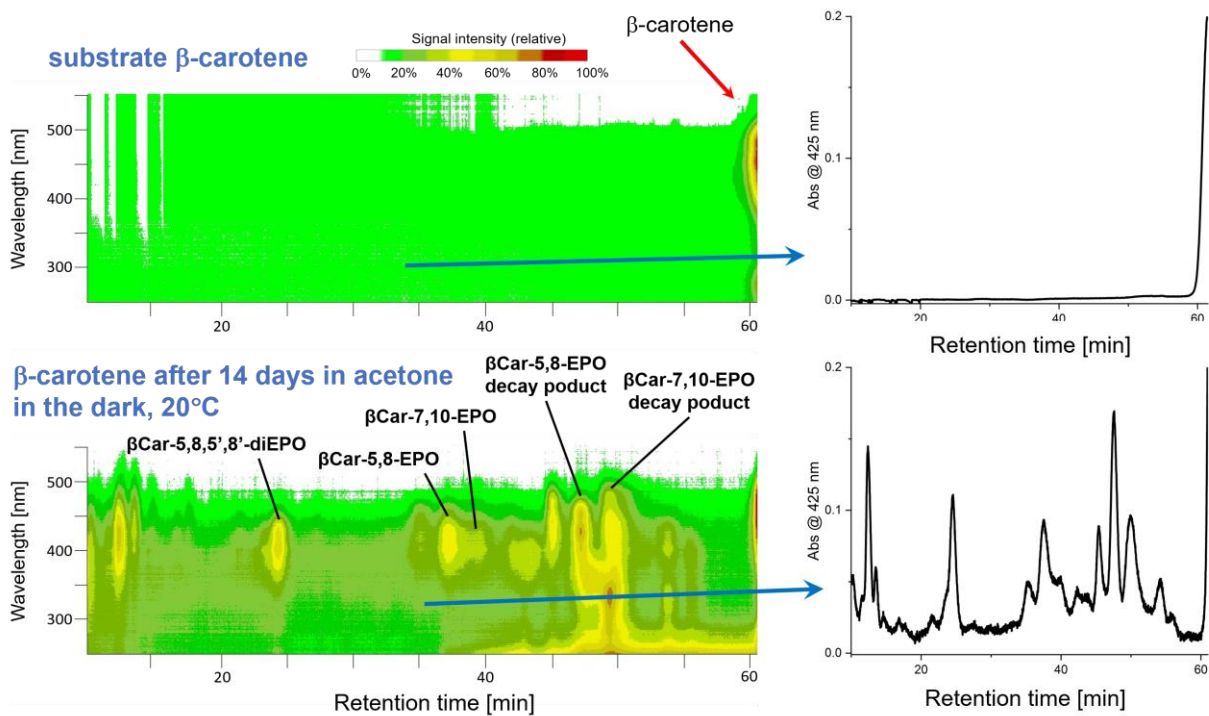

**Supplementary Fig. 5** Upper panel: the RP-HPLC analysis with in-line diode-array recording of electronic absorption spectra of the purified  $\beta$ -carotene used as the substrate in the oxygenation reactions. On the right, the corresponding chromatogram recorded at 425 nm. Lower panel: the RP-HPLC analysis with in-line diode-array recording of electronic absorption spectra of the products of  $\beta$ -carotene oxygenation in acetone obtained after two weeks of standing at room temperature in the dark, showing the presence of  $\beta$ Car-EPOs and their decay products. On the right, the corresponding chromatogram recorded at 425 nm. The conditions of the separation are given in the Materials and Methods section.

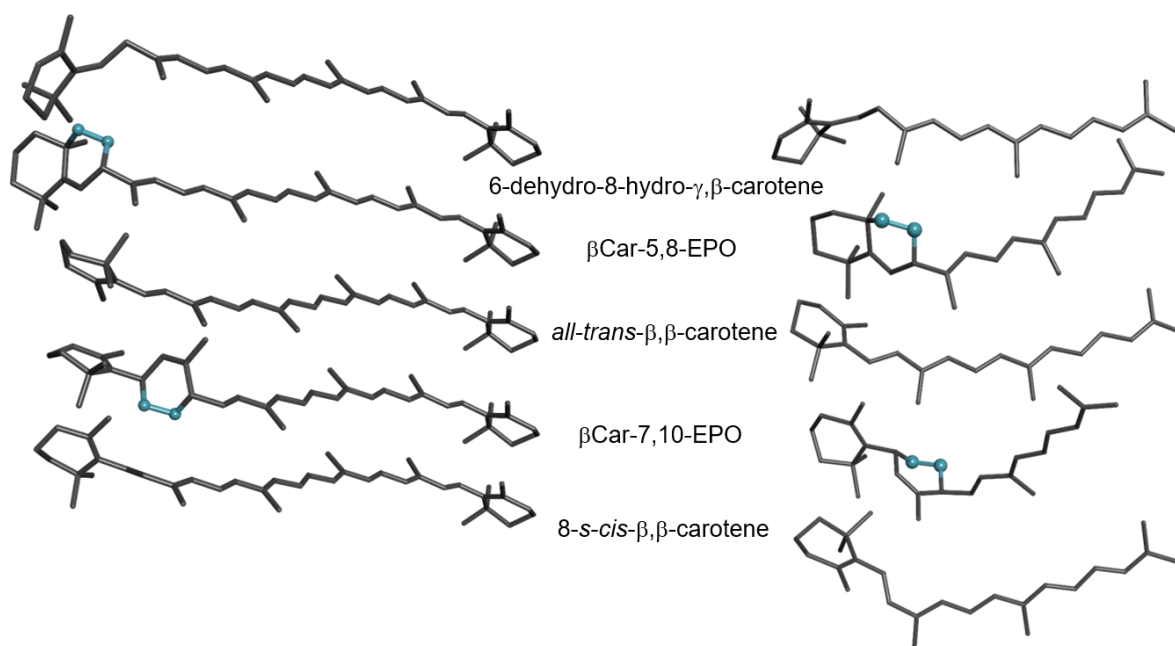

**Supplementary Fig. 6** The DFT-predicted vacuum-relaxed conformations of  $\beta$ -carotene (middle), its two endoperoxides,  $\beta$ Car-5,8-EPO and  $\beta$ Car-7,10-EPO, and the corresponding isomeric carotenes formed after the release of the  $O_2$  moiety. Left: entire molecules; right: the expanded and rotated fragments which suffer deformation due to the addition/release of  $O_2$  moiety.

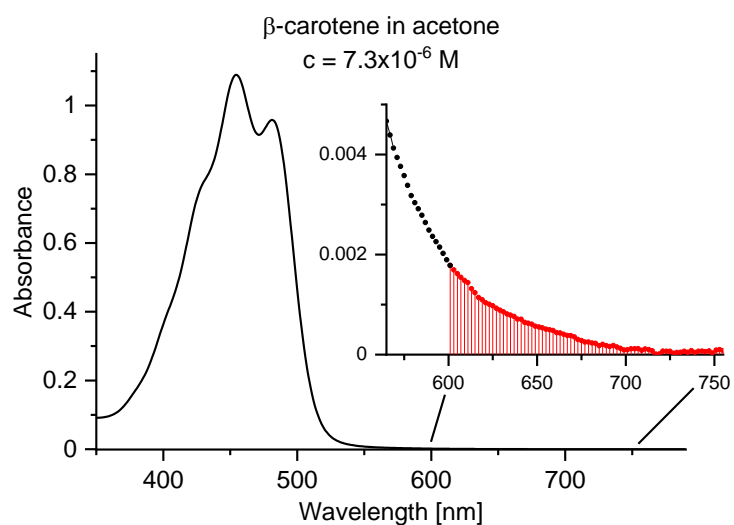

**Supplementary Fig. 7** The electronic absorption spectrum of  $\beta$ -carotene recorded in acetone and the expanded ( $\sim 100\times$ ) region between 600 and 750 nm showing the non-zero activity of the  $S_2$  transition (inset).

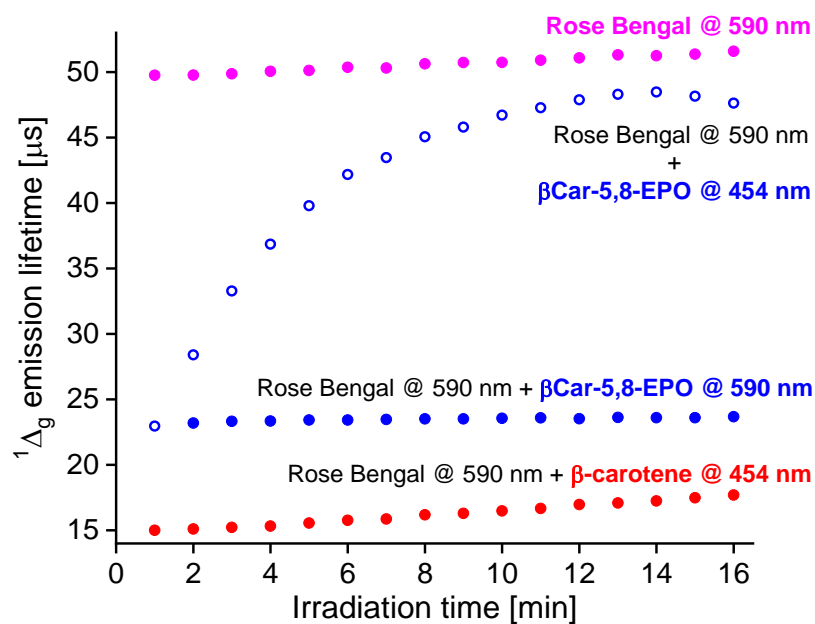

**Supplementary Fig. 8** Changes in the emission lifetime of  $^1\text{O}_2$  generated by Rose Bengal (2  $\mu\text{M}$ ) alone (rose dots) and in its mixtures with either  $\beta\text{Car}$  or  $\beta\text{Car-5,8-EPO}$  in acetone, using 590 nm excitation.  $\beta\text{Car}$  (red dots) and  $\beta\text{Car-5,8-EPO}$  (empty blue dots), each at 2.66  $\mu\text{M}$ , were independently irradiated at 454 nm with laser flashes (1 kHz). Note a large increase in the  $^1\text{O}_2$  lifetime in the mixture of Rose Bengal and  $\beta\text{Car-5,8-EPO}$  irradiated at 454 nm, and practically no effect of the irradiation at 590 nm.



**$\beta$ Car-5,8-EPO + DMPO  
in POPC liposomes**

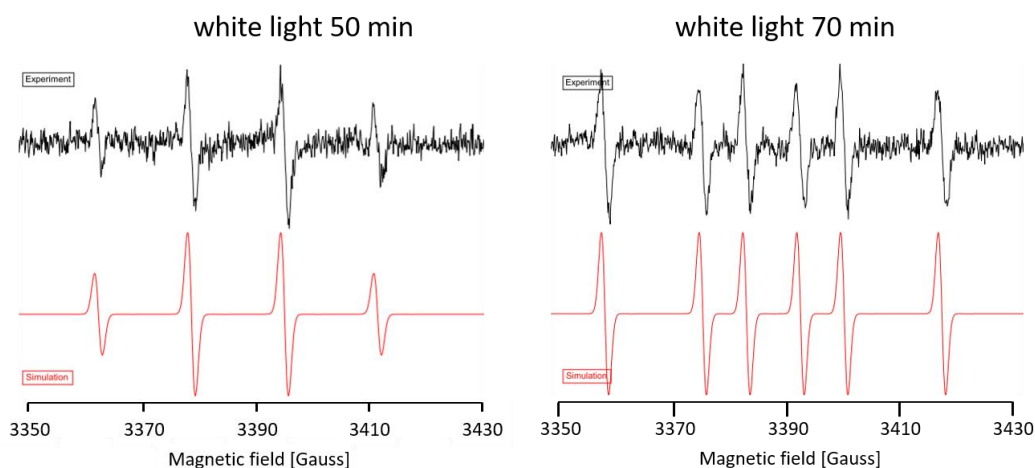

**Supplementary Fig. 9** The DMPO-spin trapping of free radicals generated by  $\beta$ Car-5,8-EPO (35  $\mu$ M) in the 1-palmitoyl-2-oleoyl-*sn*-glycero-3-phosphocholine (POPC) multilamellar liposomes under white light (30  $\text{mW}/\text{cm}^2$ ). The EPR spectra were recorded in the presence of 80  $\mu$ M DMPO during 25 min (left) and 70 min (right) of illumination. Upper traces – experimental spectra; lower traces – spectra simulated by WinSim program using parameters:  $a_N = 14.95$ ,  $a_H = 14.92$  G. No DMPO-OH adducts were detected in the liposomes alone neither for  $\beta$ Car-5,8-EPO in liposomes in the dark. Source data are provided as a Source Data file.

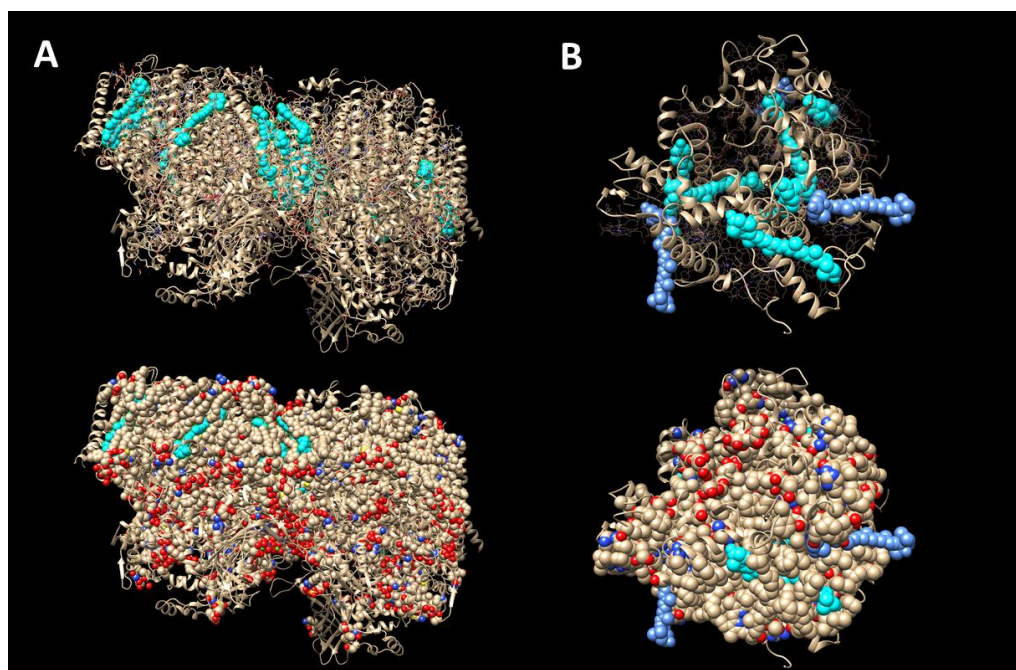

**Supplementary Fig. 10** The positioning of (A)  $\beta$ -carotenes (in cyan) in Photosystem II (PDB entry 3WU2) and (B) luteins (in cyan) and neoxanthins (in blue) in LHCII (PDB entry 2BHW). In the lower panels, the atomic van der Waals radii are shown to indicate a very dense packing of the complexes, which prevents penetration of the  $\text{O}_2$  molecules in the protein interior.  $\beta$ -Carotenes and luteins are well buried within the complexes and are protected from the  $\text{O}_2$  attack. Neoxanthins are exposed, having their 6-8 allenic and 3,5-dihydroxy moieties protruding into the lipid bilayer. The images were prepared using a Chimera 1.16 software.

## Supplementary Table 1

The DFT-computed total energies of  $\beta$ -carotene ( $\beta$ Car), the  $O_2$  molecule and other compounds involved in the formation and breakdown of  $\beta$ -carotene endoperoxides. The structures of the molecules used in the computations are also shown. For  $\beta$ Car and its derivatives, the predicted and experimental energies of the first electronic transitions (in vacuo) are listed. The structure numbering as in Fig. 4 in the main text.

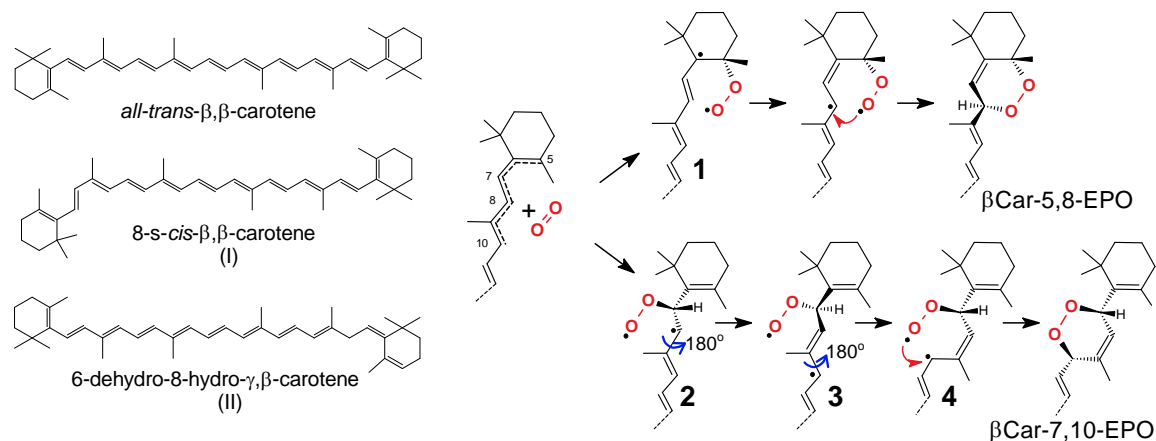

|                                | DFT<br>total energy | stabilization energy<br>(difference to parental<br>system) |          | energy of the 1st allowed<br>electronic transition ( $S_2$ ) |                                                 |
|--------------------------------|---------------------|------------------------------------------------------------|----------|--------------------------------------------------------------|-------------------------------------------------|
|                                | [hartree]           | [hartree]                                                  | [kJ/mol] | predicted<br>[ $cm^{-1}$ (nm)]                               | experimental<br>(0-1 band)<br>[ $cm^{-1}$ (nm)] |
| $\beta$ Car                    | -1557.9089          | 0                                                          | 0        | 17986 (556)                                                  | 22026 (454)                                     |
| "half-flat" $\beta$ Car*       | -1557.8976          | -0.0113                                                    | -29.67   |                                                              |                                                 |
| carotene I                     | -1557.8966          | -0.0123                                                    | -32.29   | 18051 (554)                                                  | 23310 (429)                                     |
| carotene II                    | -1557.8877          | -0.0212                                                    | -55.66   | 19608 (510)                                                  | 25707 (389)                                     |
| $O_2$                          | -150.2574           |                                                            |          |                                                              |                                                 |
| $\beta$ Car + $O_2$            | -1708.1663          | 0                                                          | 0        |                                                              |                                                 |
| $\beta$ Car-5,8-EPO            | -1708.2559          | +0.0896                                                    | +235.24  | 19608 (510)                                                  | 23474 (426)                                     |
| $\beta$ Car-7,10-EPO           | -1708.2392          | +0.0729                                                    | +191.40  | 20661 (484)                                                  | 24876 (402)                                     |
| $O_2$ attack on C8             | -1708.1787          | +0.0124                                                    | +32.56   |                                                              |                                                 |
| $O_2$ attack on C5 (1)         | -1708.2052          | +0.0389                                                    | +102.13  |                                                              |                                                 |
| $O_2$ attack on C10            | -1708.1840          | +0.0177                                                    | +46.47   |                                                              |                                                 |
| $O_2$ attack on C7 (2)         | -1708.2034          | +0.0371                                                    | +97.41   |                                                              |                                                 |
| C8-C9 rotation<br>product (3)  | -1708.1985          | +0.0322                                                    | +84.54   |                                                              |                                                 |
| C9-C10 rotation<br>product (4) | -1708.1928          | +0.0265                                                    | +69.58   |                                                              |                                                 |

\*one ionone ring forced into the molecular plane

### Supplementary Table 2

The DFT-computed total energies and conformations of the endoperoxide moieties of  $\beta$ Car-5,8-EPO and  $\beta$ Car-7,10-EPO truncated at various sites of the molecules, as indicated in the structural formulas. The predicted conformations (in vacuo) of the truncated molecules (color-coded) are overlapped at the -O-O-bridges for a better comparison.

| truncated $\beta$ Car-5,8-EPO | total energy [hartree] | predicted conformation (overlapped) | truncated $\beta$ Car-7,10-EPO | total energy [hartree] | predicted conformation (overlapped) |
|-------------------------------|------------------------|-------------------------------------|--------------------------------|------------------------|-------------------------------------|
|                               | - 897.0976             |                                     |                                | - 897.0947             |                                     |
| (green)                       |                        |                                     | (green)                        |                        |                                     |
|                               | - 891.2328             |                                     |                                | - 891.2167             |                                     |
| (red)                         |                        |                                     | (red)                          |                        |                                     |
|                               | - 851.9126             |                                     |                                | - 851.8959             |                                     |
| (gray)                        |                        |                                     | (gray)                         |                        |                                     |

**Supplementary Table 3**

Comparison of the solvent effects on the basic electronic properties of *all-trans*- $\beta,\beta$ -carotene ( $\beta$ Car),  $\beta$ Car-5,8-EPO and  $\beta$ Car-7,10-EPO, computed with the use of the TD-DFT method within the PCM model.

| carotenoid           | medium           | Ground state energy [hartree] | $\Delta E$ (pairwise) [kJ/mol] | Dipole Moment [D] | Polarizability [Bohr <sup>3</sup> ] | HOMO energy [hartree] | LUMO energy [hartree] | $\Delta LH$ [cm <sup>-1</sup> /nm] | 1st allowed electronic transition (S <sub>2</sub> ) [nm] | oscillator strength |
|----------------------|------------------|-------------------------------|--------------------------------|-------------------|-------------------------------------|-----------------------|-----------------------|------------------------------------|----------------------------------------------------------|---------------------|
| $\beta$ Car          | cyclohexane      | -1557.9043                    |                                | 0.136             | 1106.92                             | -0.16257              | -0.08107              | 17886.93 / 559.1                   | 592                                                      | 3.925               |
|                      | acetone          | -1557.9090                    |                                | 0.138             | 1308.94                             | -0.16511              | -0.08387              | 17829.87 / 560.9                   | 594                                                      | 3.927               |
|                      | ethanol          | -1557.9094                    |                                | 0.153             | 1314.46                             | -0.16519              | -0.08396              | 17827.67 / 560.9                   | 594                                                      | 3.927               |
|                      | H <sub>2</sub> O | -1557.9096                    |                                | 0.153             | 1332.95                             | -0.16546              | -0.08425              | 17823.28 / 561.1                   | 594                                                      | 3.928               |
| $\beta$ Car-5,8-EPO  | cyclohexane      | -1708.2600                    | –                              | 2.647             | 941.74                              | -0.16576              | -0.07781              | 19302.52 / 518.1                   | 548                                                      | 3.512               |
|                      | acetone          | -1708.2668                    | –                              | 3.189             | 1105.27                             | -0.16876              | -0.08103              | 19254.24 / 519.4                   | 545                                                      | 3.493               |
|                      | ethanol          | -1708.2670                    | –                              | 3.205             | 1109.78                             | -0.16885              | -0.08113              | 19252.04 / 519.4                   | 545                                                      | 3.493               |
|                      | H <sub>2</sub> O | -1708.2676                    | –                              | 3.261             | 1124.81                             | -0.16917              | -0.08147              | 19247.65 / 519.5                   | 544                                                      | 3.489               |
| $\beta$ Car-7,10-EPO | cyclohexane      | -1708.2428                    | +45.16                         | 2.912             | 828.42                              | -0.17041              | -0.07631              | 20652.27 / 484.2                   | 509                                                      | 3.067               |
|                      | acetone          | -1708.2488                    | +47.26                         | 3.872             | 970.93                              | -0.17319              | -0.07983              | 20489.86 / 488.0                   | 510                                                      | 3.022               |
|                      | ethanol          | -1708.2490                    | +47.26                         | 3.902             | 974.99                              | -0.17328              | -0.07995              | 20483.28 / 488.2                   | 511                                                      | 3.021               |
|                      | H <sub>2</sub> O | -1708.2498                    | +46.73                         | 4.872             | 998.25                              | -0.17437              | -0.08191              | 20292.34 / 492.8                   | 515                                                      | 2.974               |
